# Supplementary material for: Investigating plant cell wall components that affect biomass recalcitrance in poplar and switchgrass
Source: Royal Society of Chemistry journal article supplement (doi:10.1039/c3ee23801f), 2013-01-01
Supplement: c3ee23801f.pdf [file c3ee23801f.pdf]

**Supplemental Table S1:** Listing of plant cell wall glycan-directed monoclonal antibodies (mAbs) used for Glycome Profiling analyses (Figure 2 and 3). The groupings of antibodies are based on a hierarchical clustering of ELISA data generated from a screen of all mAbs against a panel of plant polysaccharide preparations<sup>1,2</sup> that groups the mAbs according to the predominant polysaccharides that they recognize. The majority of listings link to the WallMabDB plant cell wall monoclonal antibody database (<http://www.wallmabdb.net>) that provides detailed descriptions of each mAb, including immunogen, antibody isotype, epitope structure (to the extent known), supplier information, and related literature citations.

## Glycan Group Recognized    mAb Names

|                                 |                                                                                                                                                                                                  |
|---------------------------------|--------------------------------------------------------------------------------------------------------------------------------------------------------------------------------------------------|
| Non-Fucosylated<br>Xyloglucan-1 | <a href="#">CCRC-M95</a><br><a href="#">CCRC-M101</a>                                                                                                                                            |
| Non-Fucosylated<br>Xyloglucan-2 | <a href="#">CCRC-M104</a><br><a href="#">CCRC-M89</a><br><a href="#">CCRC-M93</a><br><a href="#">CCRC-M87</a><br><a href="#">CCRC-M88</a>                                                        |
| Non-Fucosylated<br>Xyloglucan-3 | <a href="#">CCRC-M100</a><br><a href="#">CCRC-M103</a>                                                                                                                                           |
| Non-Fucosylated<br>Xyloglucan-4 | <a href="#">CCRC-M58</a><br><a href="#">CCRC-M86</a><br><a href="#">CCRC-M55</a><br><a href="#">CCRC-M52</a><br><a href="#">CCRC-M99</a>                                                         |
| Non-Fucosylated<br>Xyloglucan-5 | <a href="#">CCRC-M54</a><br><a href="#">CCRC-M48</a><br><a href="#">CCRC-M49</a><br><a href="#">CCRC-M96</a><br><a href="#">CCRC-M50</a><br><a href="#">CCRC-M51</a><br><a href="#">CCRC-M53</a> |
| Non-Fucosylated<br>Xyloglucan-6 | <a href="#">CCRC-M57</a>                                                                                                                                                                         |
| Fucosylated<br>Xyloglucan       | <a href="#">CCRC-M102</a><br><a href="#">CCRC-M39</a><br><a href="#">CCRC-M106</a>                                                                                                               |

[CCRC-M84](#)

[CCRC-M1](#)

Xylan-1/XG

[CCRC-M111](#)

[CCRC-M108](#)

[CCRC-M109](#)

Xylan-2

[CCRC-M119](#)

[CCRC-M115](#)

[CCRC-M110](#)

[CCRC-M105](#)

Xylan-3

[CCRC-M117](#)

[CCRC-M113](#)

[CCRC-M120](#)

[CCRC-M118](#)

[CCRC-M116](#)

[CCRC-M114](#)

Xylan-4

CCRC-M154

CCRC-M150

Xylan-5

CCRC-M144

CCRC-M146

CCRC-M145

CCRC-M155

Xylan-6

CCRC-M153

CCRC-M151

CCRC-M148

CCRC-M140

CCRC-M139

CCRC-M138

Xylan-7

CCRC-M160

[CCRC-M137](#)

CCRC-M152

CCRC-M149

|                          |                                                                                                                                                                       |
|--------------------------|-----------------------------------------------------------------------------------------------------------------------------------------------------------------------|
| Galactomannan-1          | <a href="#">CCRC-M75</a><br><a href="#">CCRC-M70</a><br><a href="#">CCRC-M74</a>                                                                                      |
| Galactomannan-2          | CCRC-M166<br>CCRC-M168<br>CCRC-M174<br>CCRC-M175                                                                                                                      |
| Acetylated Mannan        | CCRC-M169<br>CCRC-M170                                                                                                                                                |
| $\beta$ -Glucan          | <a href="#">LAMP</a><br><a href="#">BG1</a>                                                                                                                           |
| HG<br>Backbone-1         | <a href="#">CCRC-M131</a><br><a href="#">CCRC-M38</a><br><a href="#">JIM5</a>                                                                                         |
| HG<br>Backbone-2         | <a href="#">JIM136</a><br><a href="#">JIM7</a>                                                                                                                        |
| RG-I<br>Backbone         | <a href="#">CCRC-M69</a><br><a href="#">CCRC-M35</a><br><a href="#">CCRC-M36</a><br><a href="#">CCRC-M14</a><br><a href="#">CCRC-M129</a><br><a href="#">CCRC-M72</a> |
| Linseed Mucilage<br>RG-I | <a href="#">JIM3</a><br><a href="#">CCRC-M40</a><br>CCRC-M161<br>CCRC-M164                                                                                            |
| Physcomitrella<br>Pectin | <a href="#">CCRC-M98</a><br><a href="#">CCRC-M94</a>                                                                                                                  |
| RG-Ia                    | <a href="#">CCRC-M5</a><br><a href="#">CCRC-M2</a>                                                                                                                    |
| RG-Ib                    | <a href="#">JIM137</a>                                                                                                                                                |

[JIM101](#)

[CCRC-M61](#)

[CCRC-M30](#)

RG-Ic

[CCRC-M23](#)

[CCRC-M17](#)

[CCRC-M19](#)

[CCRC-M18](#)

[CCRC-M56](#)

[CCRC-M16](#)

RG-I/Arabinogalactan

[CCRC-M60](#)

[CCRC-M41](#)

[CCRC-M80](#)

[CCRC-M79](#)

[CCRC-M44](#)

[CCRC-M33](#)

[CCRC-M32](#)

[CCRC-M13](#)

[CCRC-M42](#)

[CCRC-M24](#)

[CCRC-M12](#)

[CCRC-M7](#)

[CCRC-M77](#)

[CCRC-M25](#)

[CCRC-M9](#)

[CCRC-M128](#)

[CCRC-M126](#)

[CCRC-M134](#)

[CCRC-M125](#)

[CCRC-M123](#)

[CCRC-M122](#)

[CCRC-M121](#)

[CCRC-M112](#)

[CCRC-M21](#)

[JIM131](#)

[CCRC-M22](#)

[JIM132](#)

[JIM1](#)

|                   |                                                                                                                                                                                                                                                                       |
|-------------------|-----------------------------------------------------------------------------------------------------------------------------------------------------------------------------------------------------------------------------------------------------------------------|
|                   | <a href="#">CCRC-M15</a><br><a href="#">CCRC-M8</a><br><a href="#">JIM16</a>                                                                                                                                                                                          |
| Arabinogalactan-1 | <a href="#">JIM93</a><br><a href="#">JIM94</a><br><a href="#">JIM11</a><br><a href="#">MAC204</a><br><a href="#">JIM20</a>                                                                                                                                            |
| Arabinogalactan-2 | <a href="#">JIM14</a><br><a href="#">JIM19</a><br><a href="#">JIM12</a><br><a href="#">CCRC-M133</a><br><a href="#">CCRC-M107</a>                                                                                                                                     |
| Arabinogalactan-3 | <a href="#">JIM4</a><br><a href="#">CCRC-M31</a><br><a href="#">JIM17</a><br><a href="#">CCRC-M26</a><br><a href="#">JIM15</a><br><a href="#">JIM8</a><br><a href="#">CCRC-M85</a><br><a href="#">CCRC-M81</a><br><a href="#">MAC266</a><br><a href="#">PN 16.4B4</a> |
| Arabinogalactan-4 | <a href="#">MAC207</a><br><a href="#">JIM133</a><br><a href="#">JIM13</a><br><a href="#">CCRC-M92</a><br><a href="#">CCRC-M91</a><br><a href="#">CCRC-M78</a>                                                                                                         |
| Unidentified      | <a href="#">MAC265</a><br><a href="#">CCRC-M97</a>                                                                                                                                                                                                                    |

References:

1. S. Pattathil, U. Avci, D. Baldwin, A.G. Swennes, J.A. McGill, Z. Popper, T. Bootten, A. Albert, R.H. Davis, C. Chennareddy, R. Dong, B. O'Shea, R. Rossi, C. Leoff, G. Freshour, R. Narra, M. O'Neill, W.S. York and M.G. Hahn, *Plant Physiol.*, 2010, **153**: 514-525.
2. S. Pattathil, U. Avci, J.S. Miller and M.G. Hahn (2012). Immunological Approaches to Plant Cell Wall and Biomass Characterization: Glycome Profiling. In *Biomass Conversion: Methods and Protocols* (Springer), Volume 908, Part 1, 61-72.
